# Supplementary material
Source: Springer Nature journal article supplement (https://www.springermedizin.de/resource/supplementary/13063_2014_2209_MOESM1_ESM.pdf/9621636)
Supplement: MOESM1 [file 9621636]

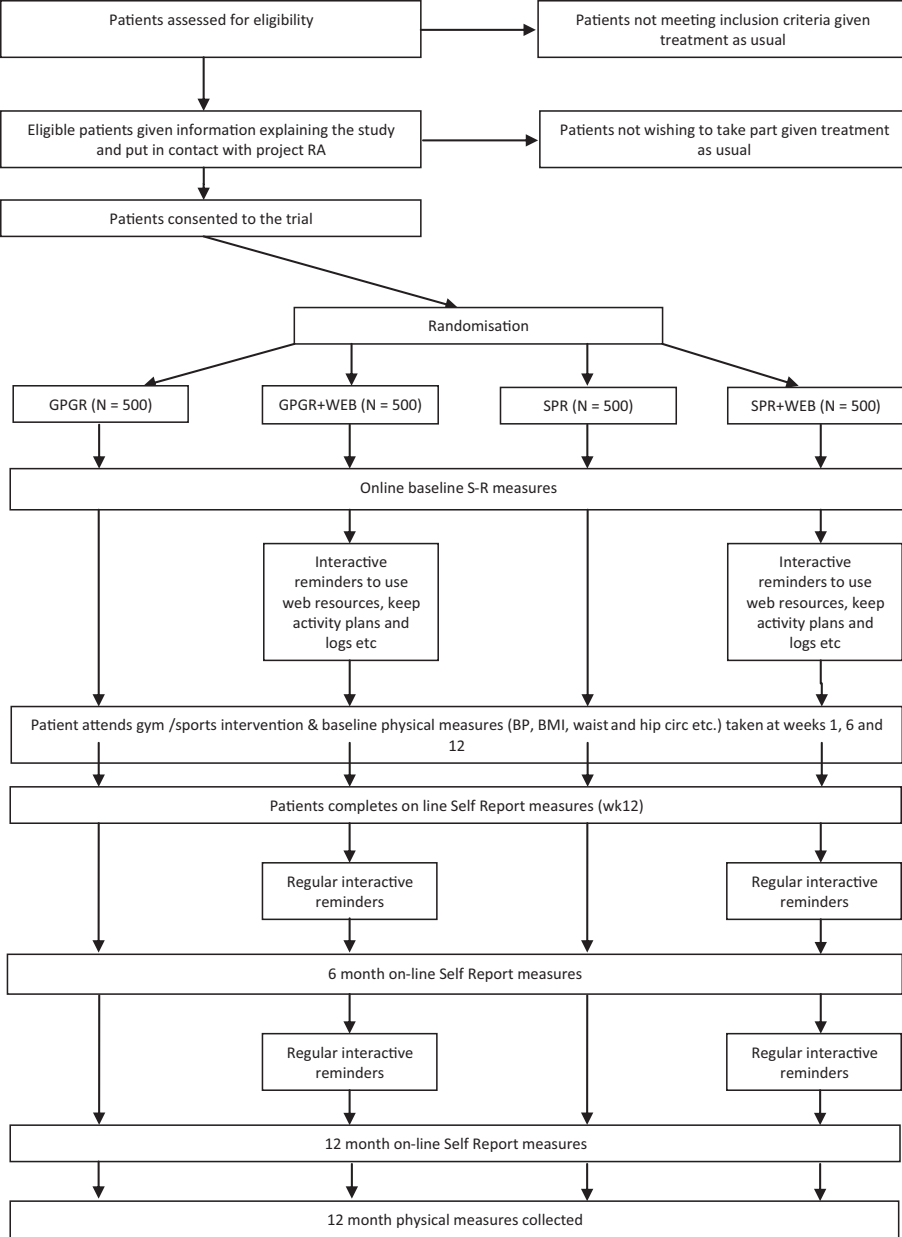

Key: GPGR - GP gym-based referral/treatment as usual control, GPGR+WEB - GP gym-based referral plus web tool, SPR - Sport referral at Surrey Sports Park, SPR+WEB - Sport referral plus web tool
